# Supplementary material for: Synthesis of a yolk/shell Fe3O4@poly(ionic liquid)s-derived nitrogen doped graphitic porous carbon materials and its application as support for nickel catalysts
Source: Royal Society of Chemistry journal article supplement (doi:10.1039/c4ra10374b), 2014-11-19
Supplement: c4ra10374b1.pdf [file c4ra10374b1.pdf]

## Supplementary Information

### Synthesis of yolk/shell $\text{Fe}_3\text{O}_4$ @poly(ionic liquid)s-derived nitrogen doped graphitic porous carbon materials and its application as support for nickel catalysts

Mohammad Reza Nabid\*, Yasamin Bide, Zahra Habibi

Faculty of Chemistry, Department of Polymer, Shahid Beheshti University, G.C., P.O. Box 1983963113

Tehran, Iran

Email: [m-nabid@sbu.ac.ir](mailto:m-nabid@sbu.ac.ir)

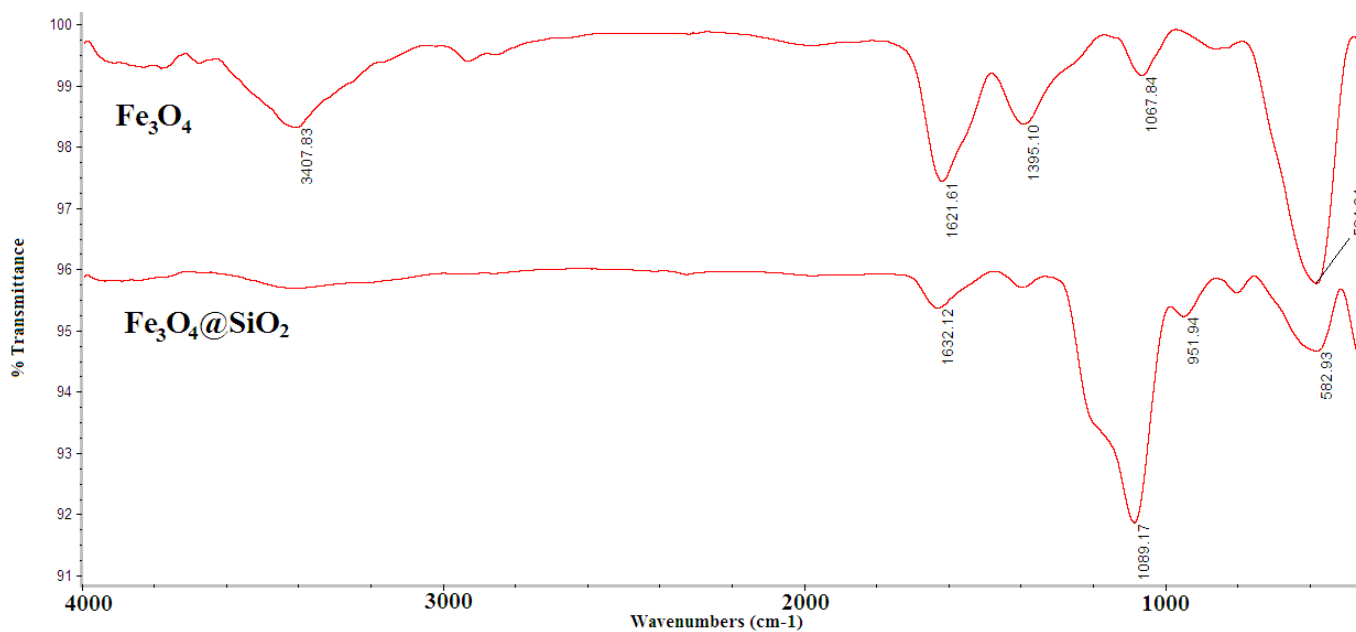

**Fig. S1** FT-IR spectra of  $\text{Fe}_3\text{O}_4$ , and  $\text{Fe}_3\text{O}_4$ @ $\text{SiO}_2$

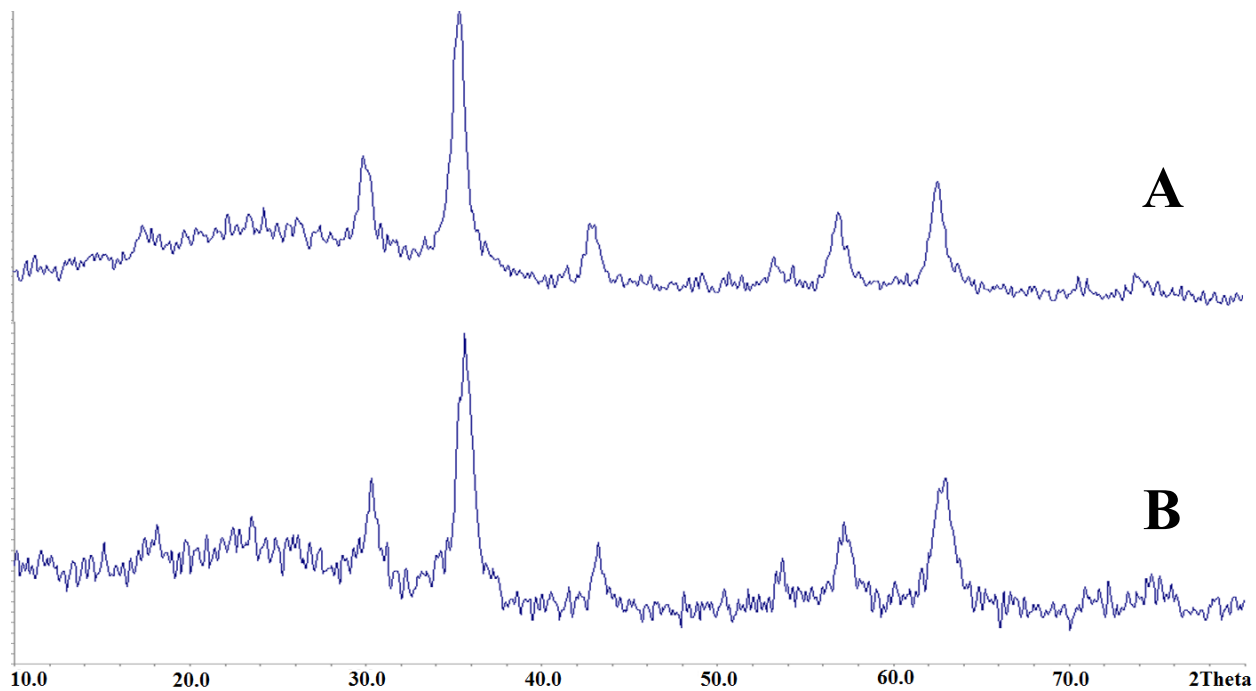

**Fig. S2** XRD patterns of Fe<sub>3</sub>O<sub>4</sub>@SiO<sub>2</sub> (A), and Fe<sub>3</sub>O<sub>4</sub>@SiO<sub>2</sub>@PCMVIImCl (B)

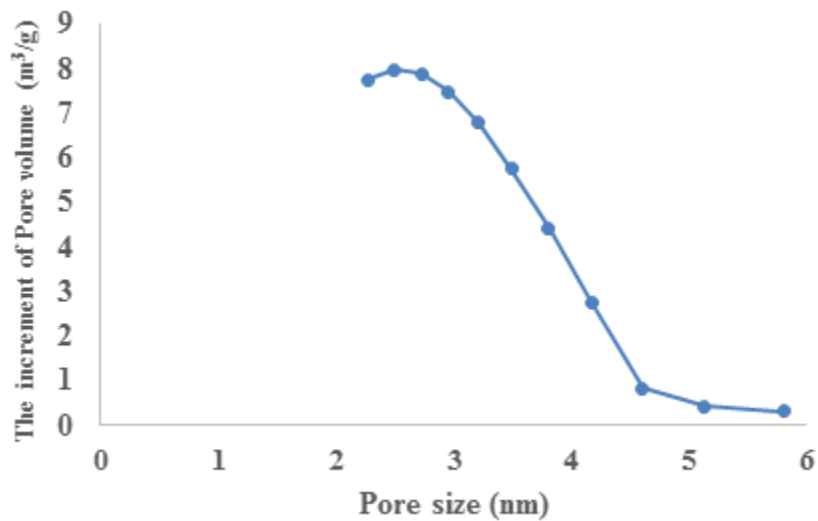

**Fig. S3** Pore size distribution plot obtained from the adsorption branch of the isotherm for YS Fe<sub>3</sub>O<sub>4</sub>@PIL-d-(N)GPC.

**Table S1** Influence of solvent, and the amount of catalyst on reduction reaction of 4-nitrotoluene.<sup>a</sup>

| Entry | Amount of catalyst<br>(Ni(0) content /mol % ) | Solvent          | Isolated Yield (%) |
|-------|-----------------------------------------------|------------------|--------------------|
| 1     | 1                                             | DMSO             | 80                 |
| 2     | 1                                             | MeOH             | 77                 |
| 3     | 1                                             | EtOH             | 83                 |
| 4     | 1                                             | H <sub>2</sub> O | 90                 |
| 6     | 1.2                                           | H <sub>2</sub> O | 92                 |
| 7     | 0.8                                           | H <sub>2</sub> O | 81                 |
| 10    | 0                                             | H <sub>2</sub> O | -                  |

<sup>a</sup> Reaction conditions: 1 mmol 4-nitrotoluene, 0.5 mmol NaBH<sub>4</sub>, 5 mL solvent, NiNPs@YS Fe<sub>3</sub>O<sub>4</sub>@PIL-d-(N)GPC as catalyst.

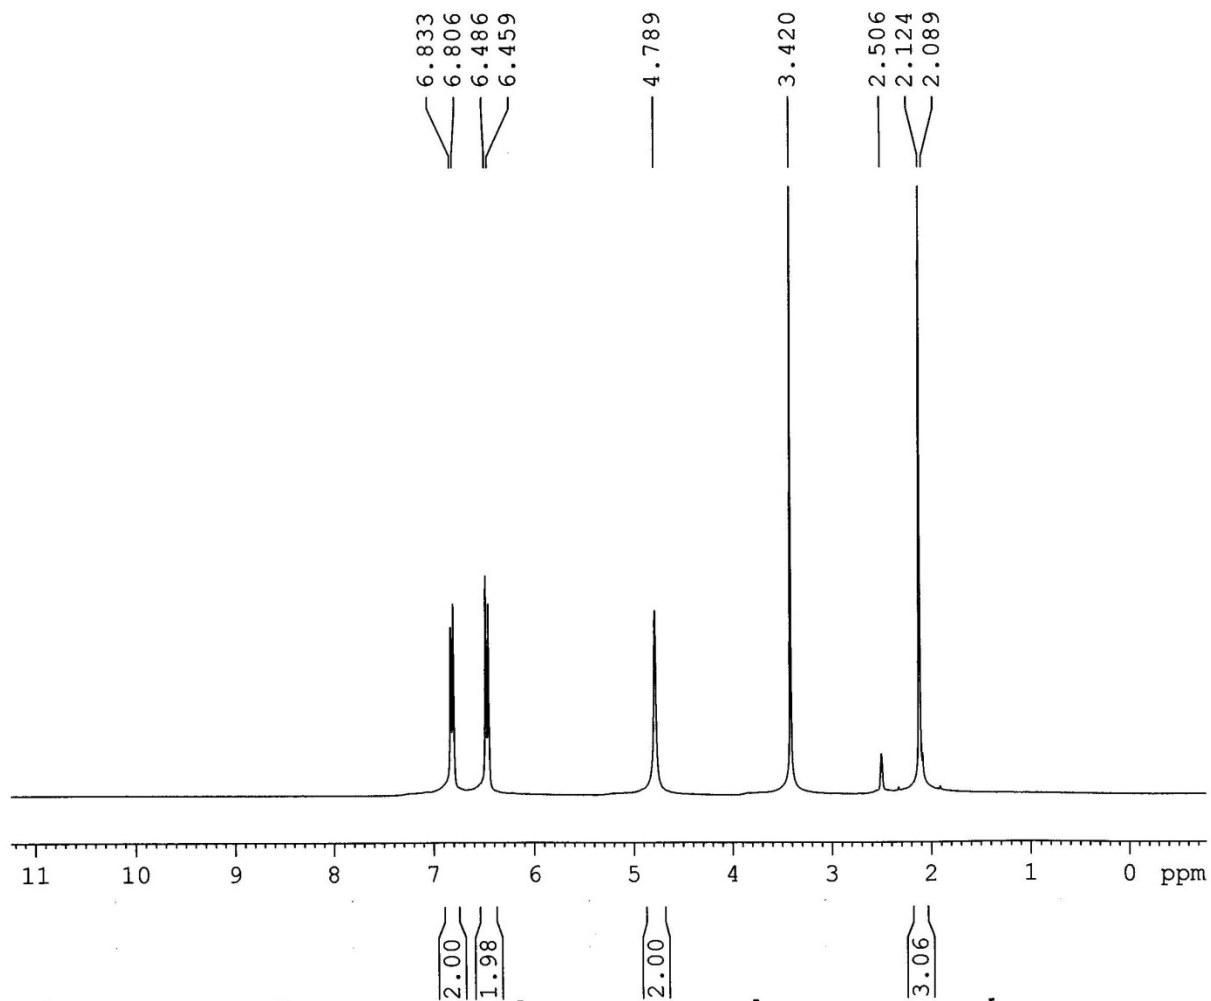

**Fig. S4**  $^1\text{H}$  NMR spectrum of p-toluidine in  $\text{DMSO-}d_6$ .

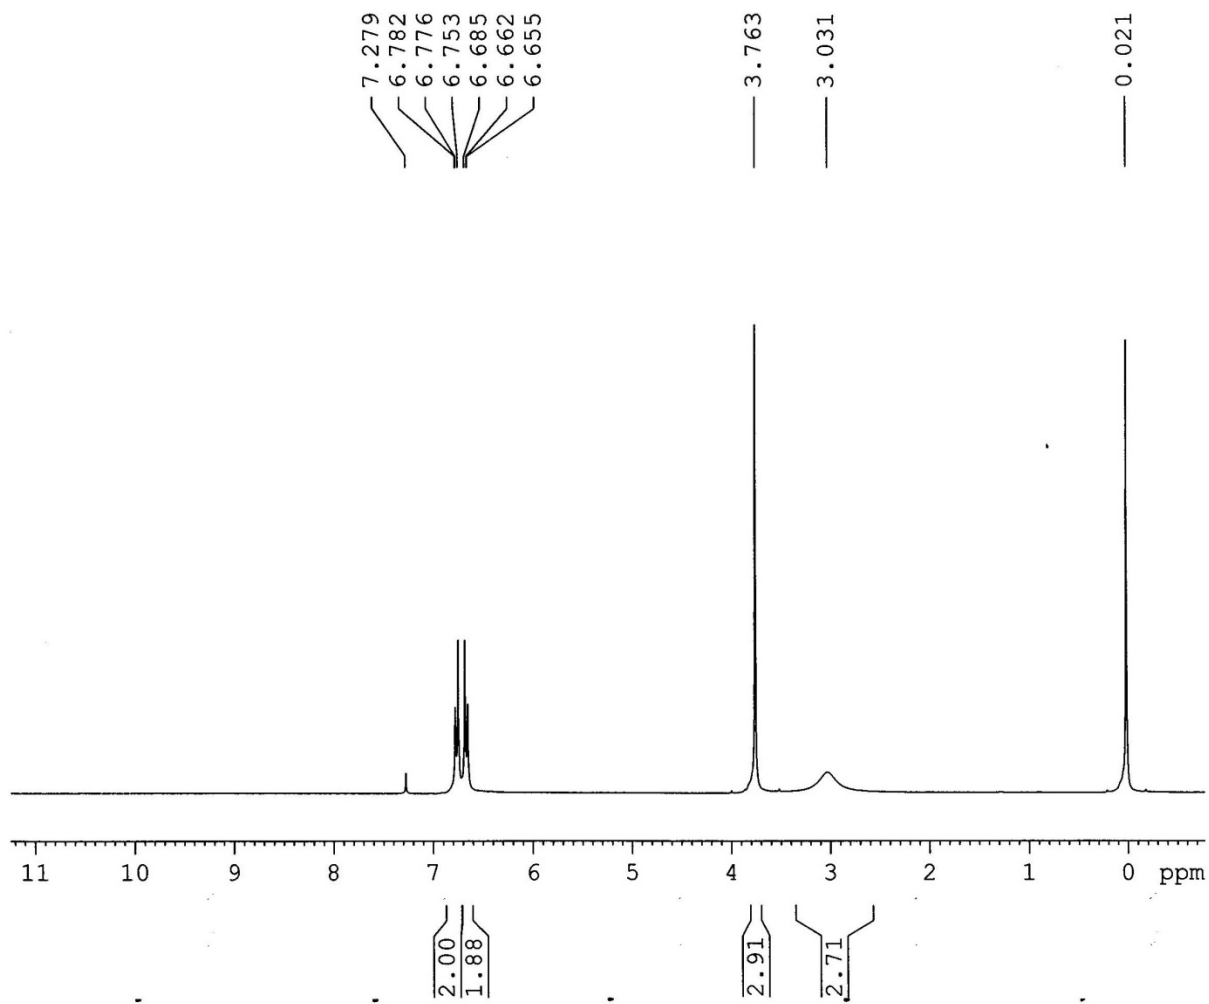

**Fig. S5**  $^1\text{H}$  NMR spectrum of 4-methoxyaniline in  $\text{CDCl}_3$ .

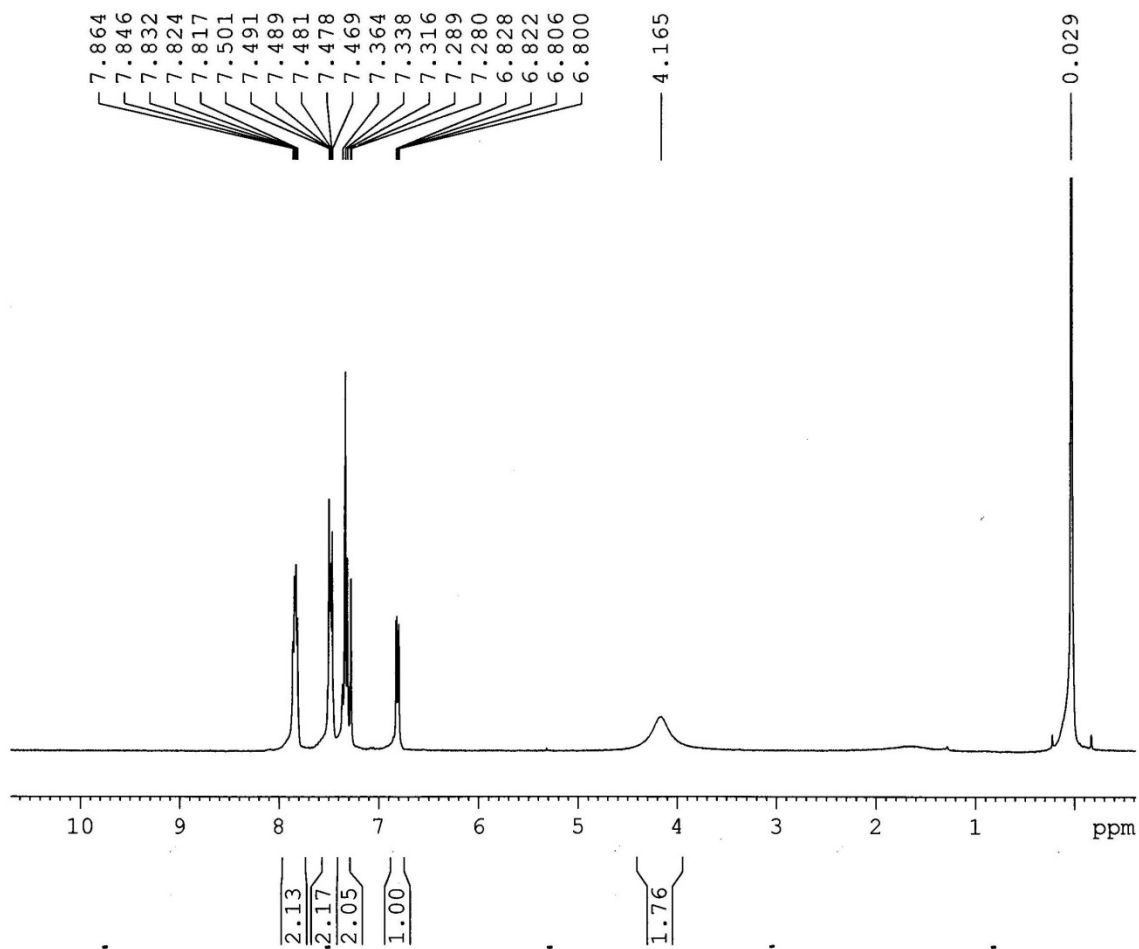

**Fig. S6**  $^1\text{H}$  NMR spectrum of naphthalen-1-amine in  $\text{CDCl}_3$ .

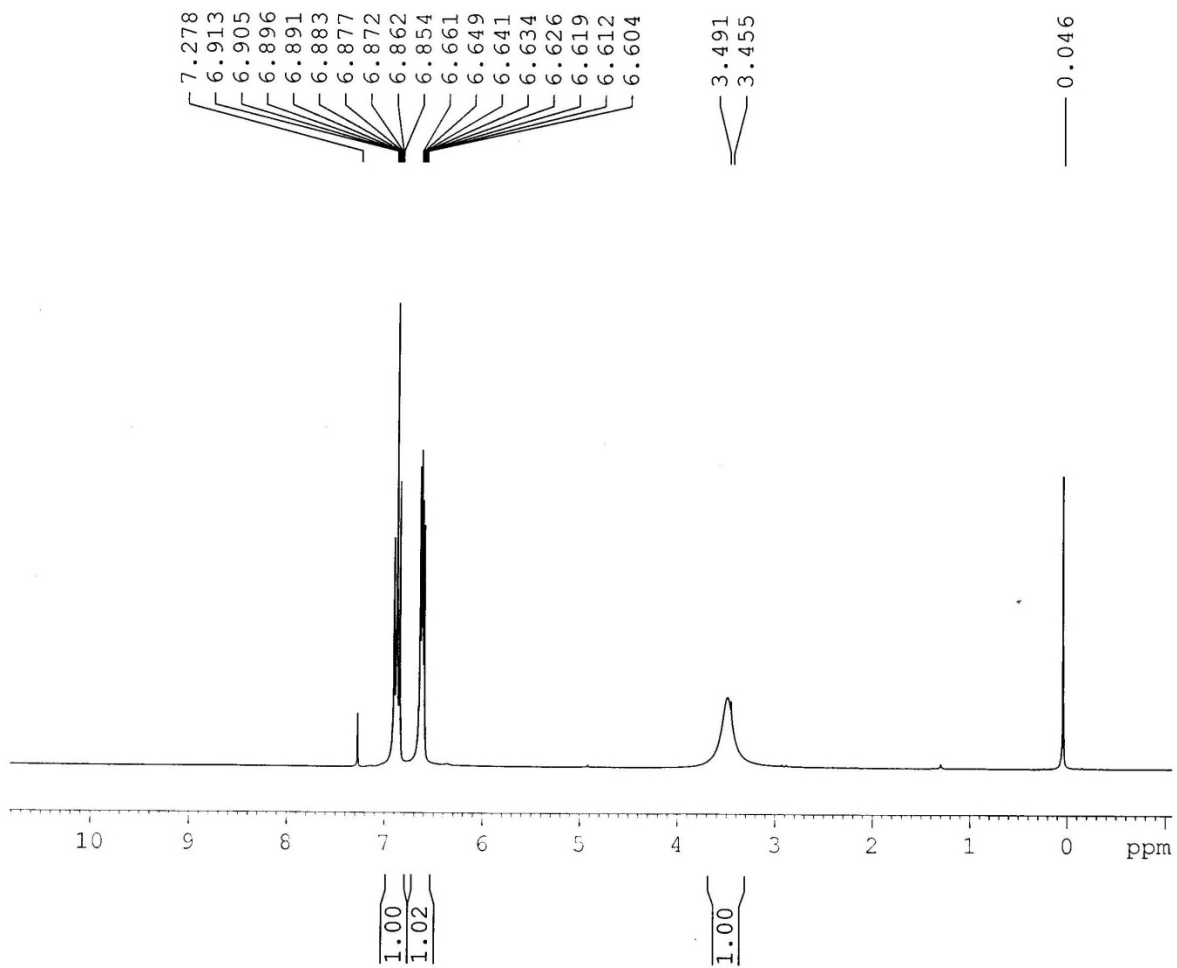

**Fig. S7**  $^1\text{H}$  NMR spectrum of 4-fluoroaniline in  $\text{CDCl}_3$ .

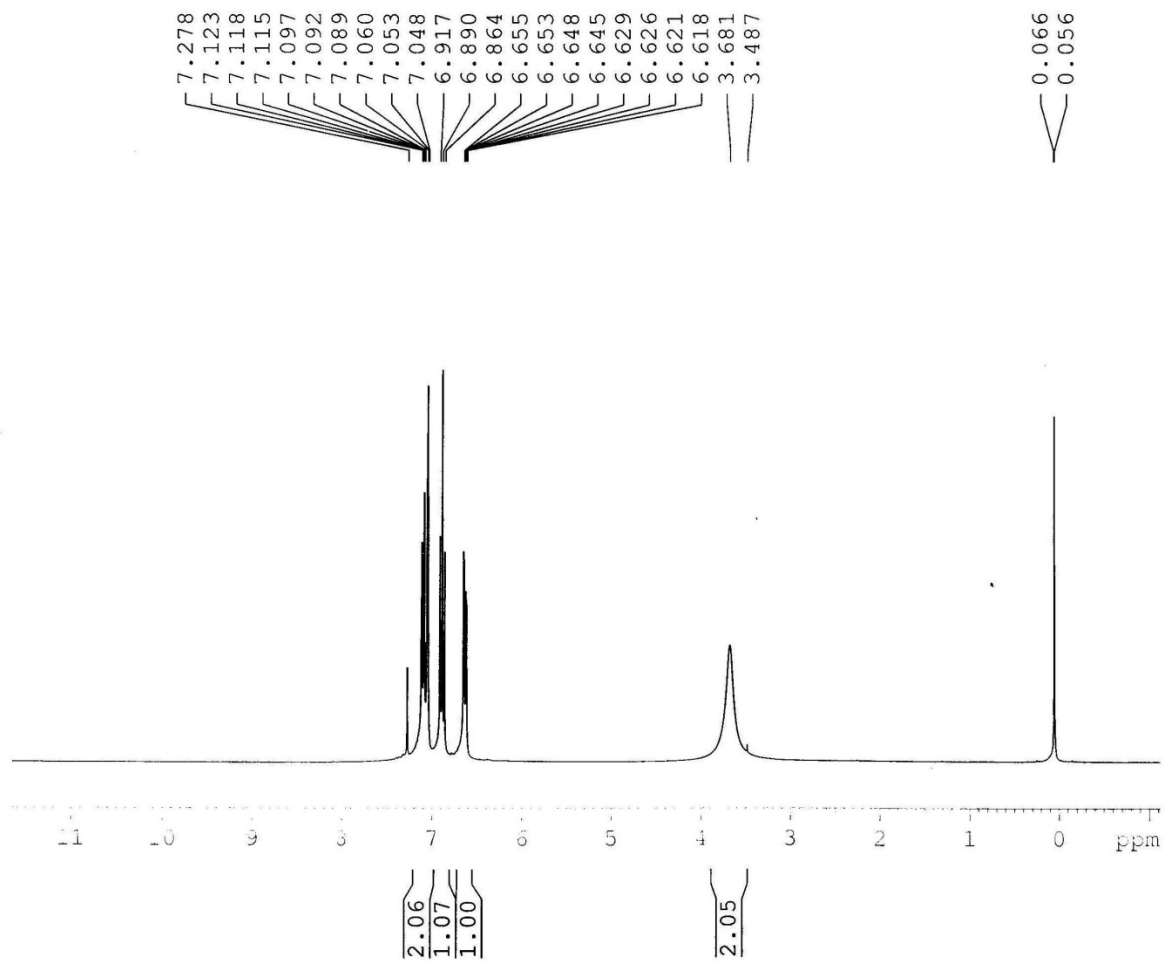

**Fig. S8**  $^1\text{H}$  NMR spectrum of 3-iodoaniline in  $\text{CDCl}_3$ .



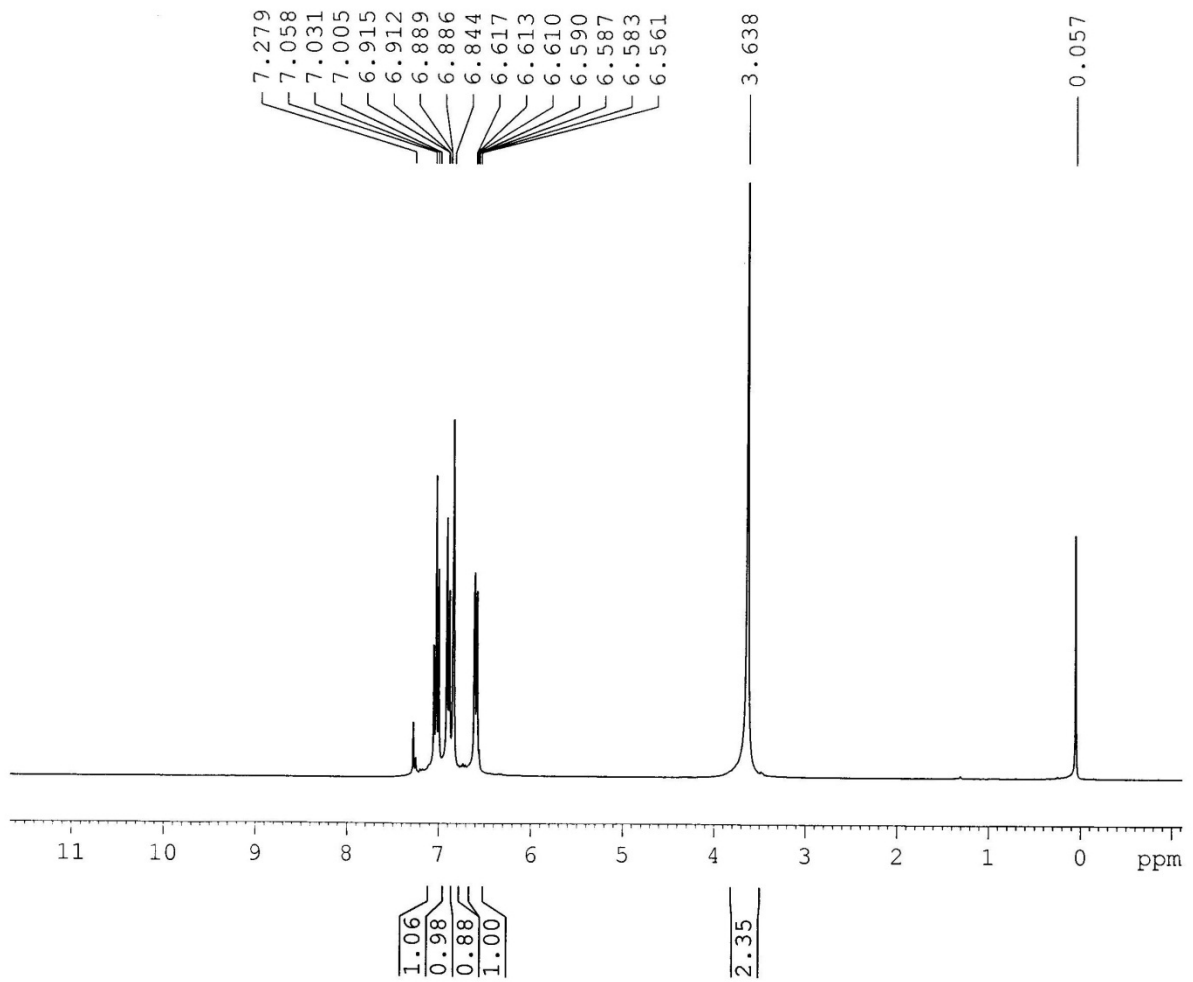

**Fig. S9**  $^1\text{H}$  NMR spectrum of 4-bromoaniline in  $\text{CDCl}_3$ .

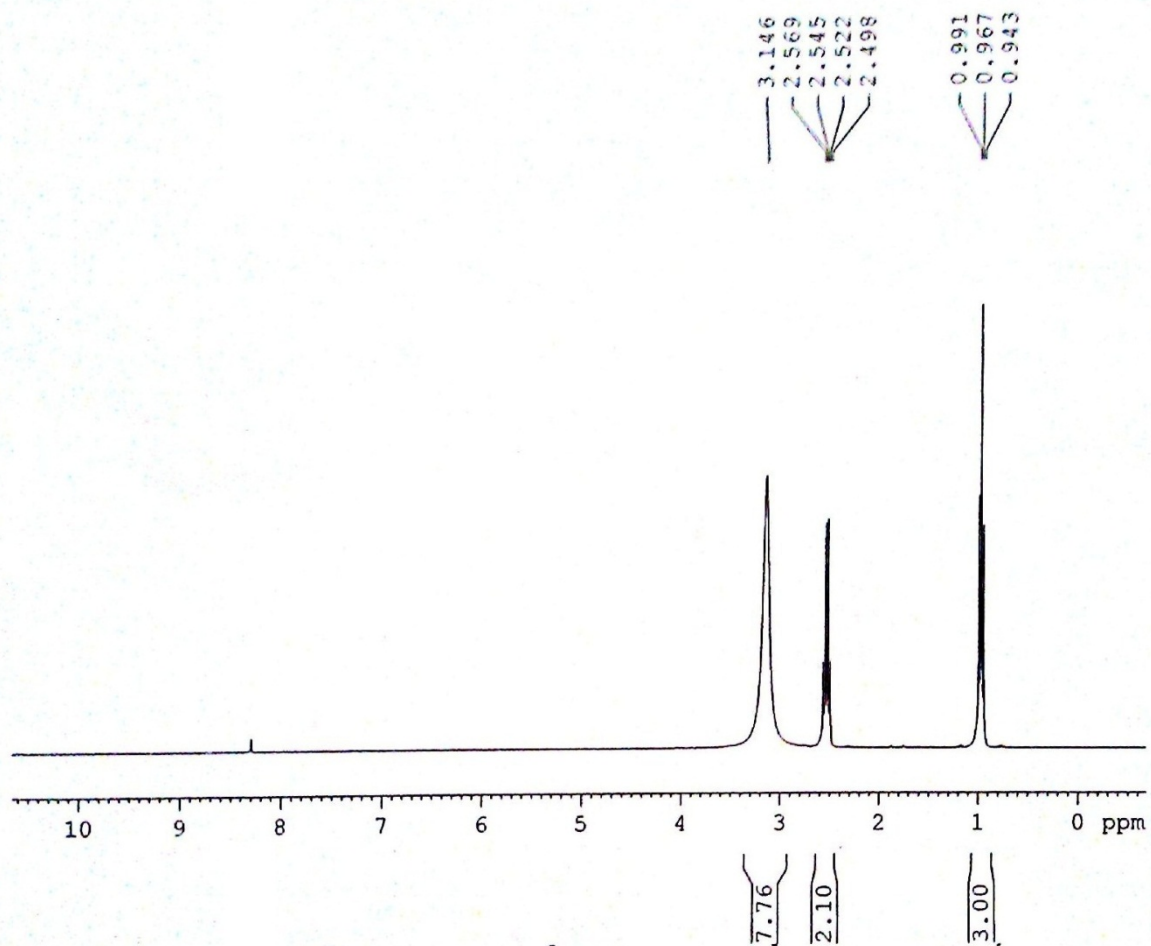

**Fig. S10**  $^1\text{H}$  NMR spectrum of ethanamine in  $\text{DMSO-}d_6$ .

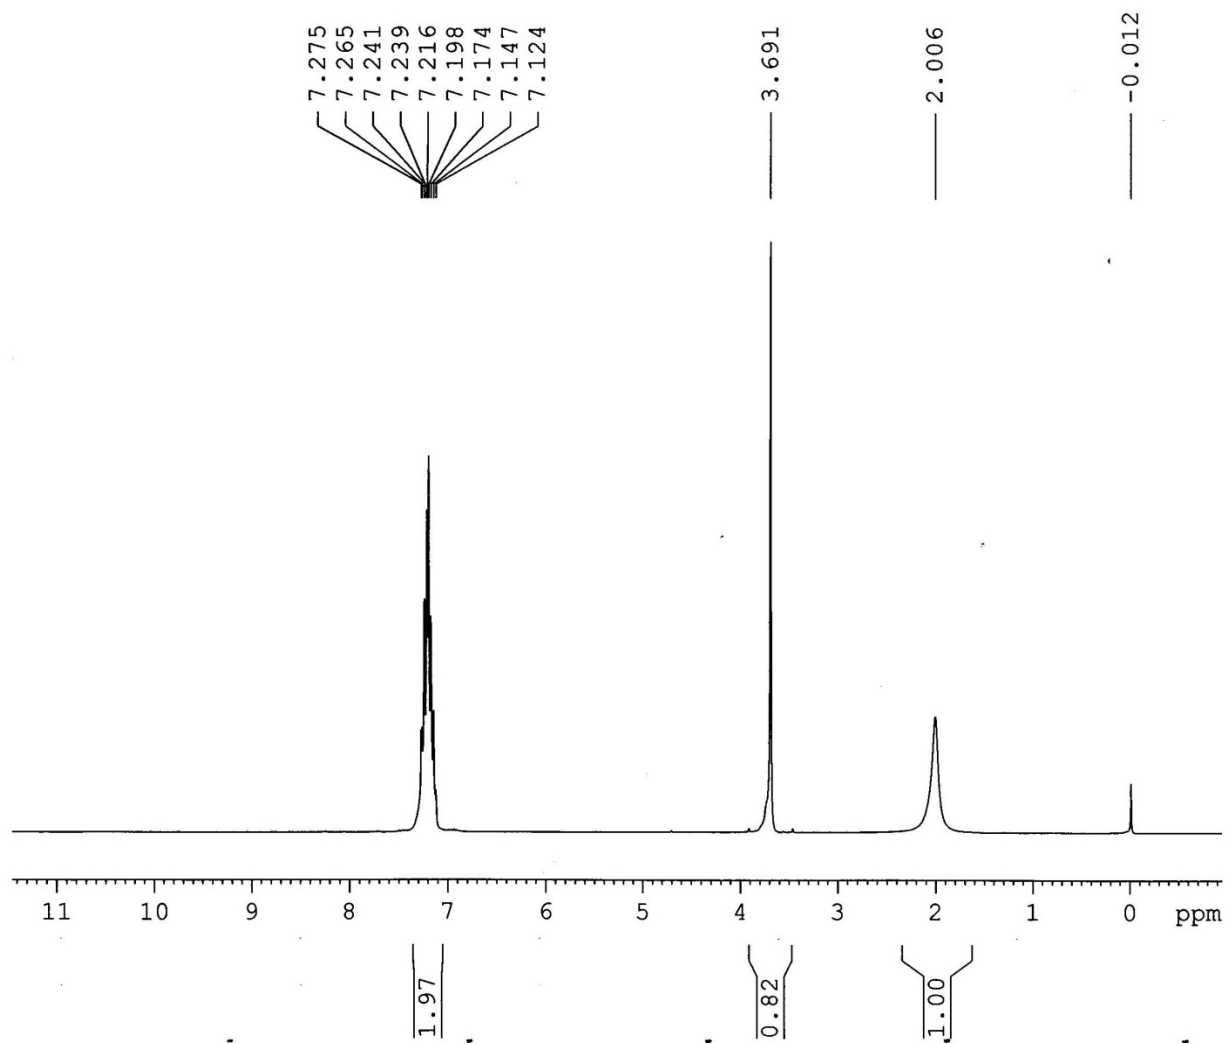

**Fig. S11**  $^1\text{H}$  NMR spectrum of phenylmethanamine in  $\text{CDCl}_3$ .

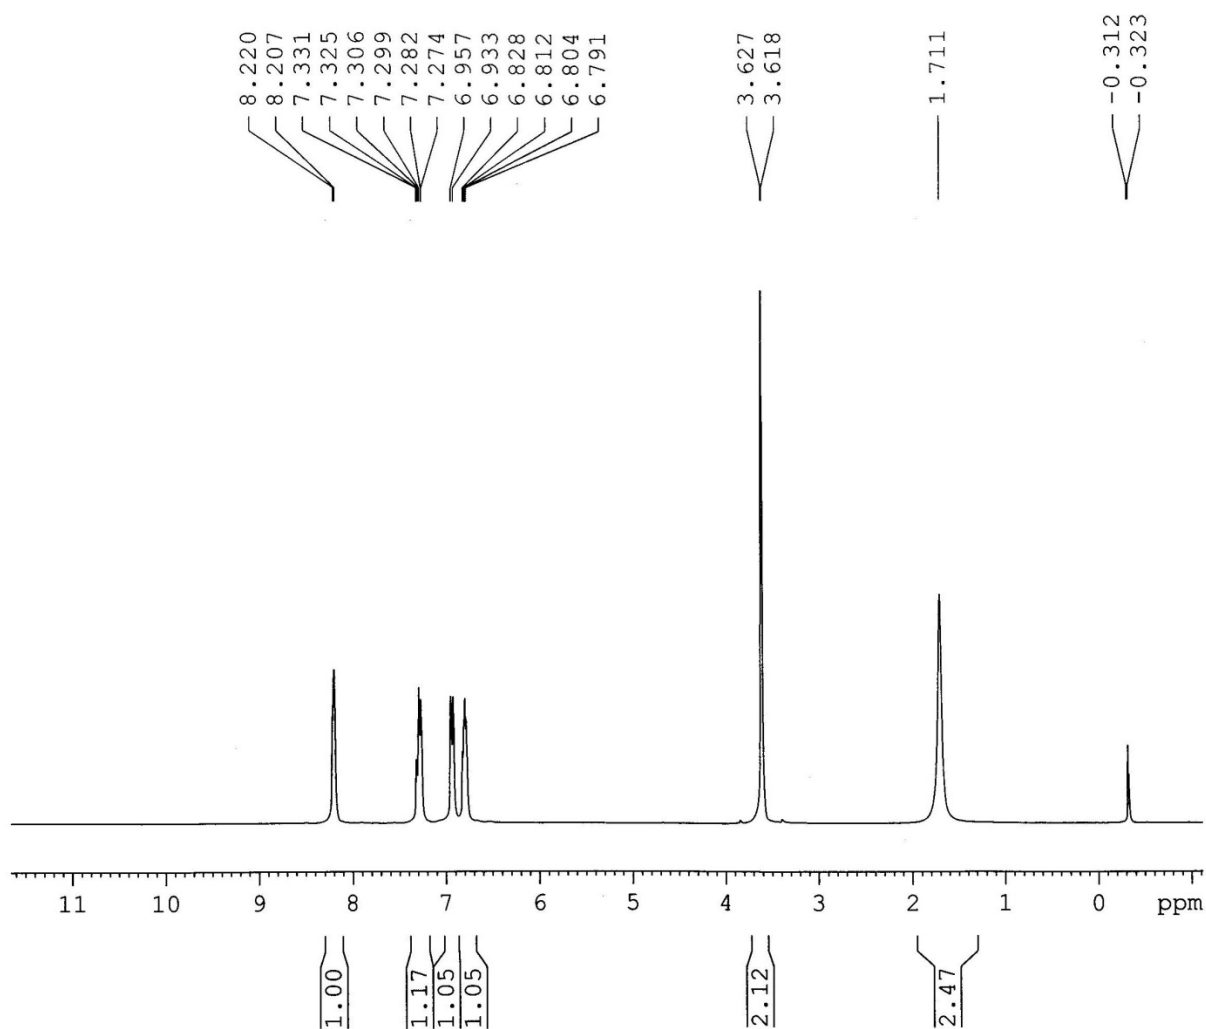

**Fig. S12**  $^1\text{H}$  NMR spectrum of pyridin-2-ylmethanamine in  $\text{CDCl}_3$ .

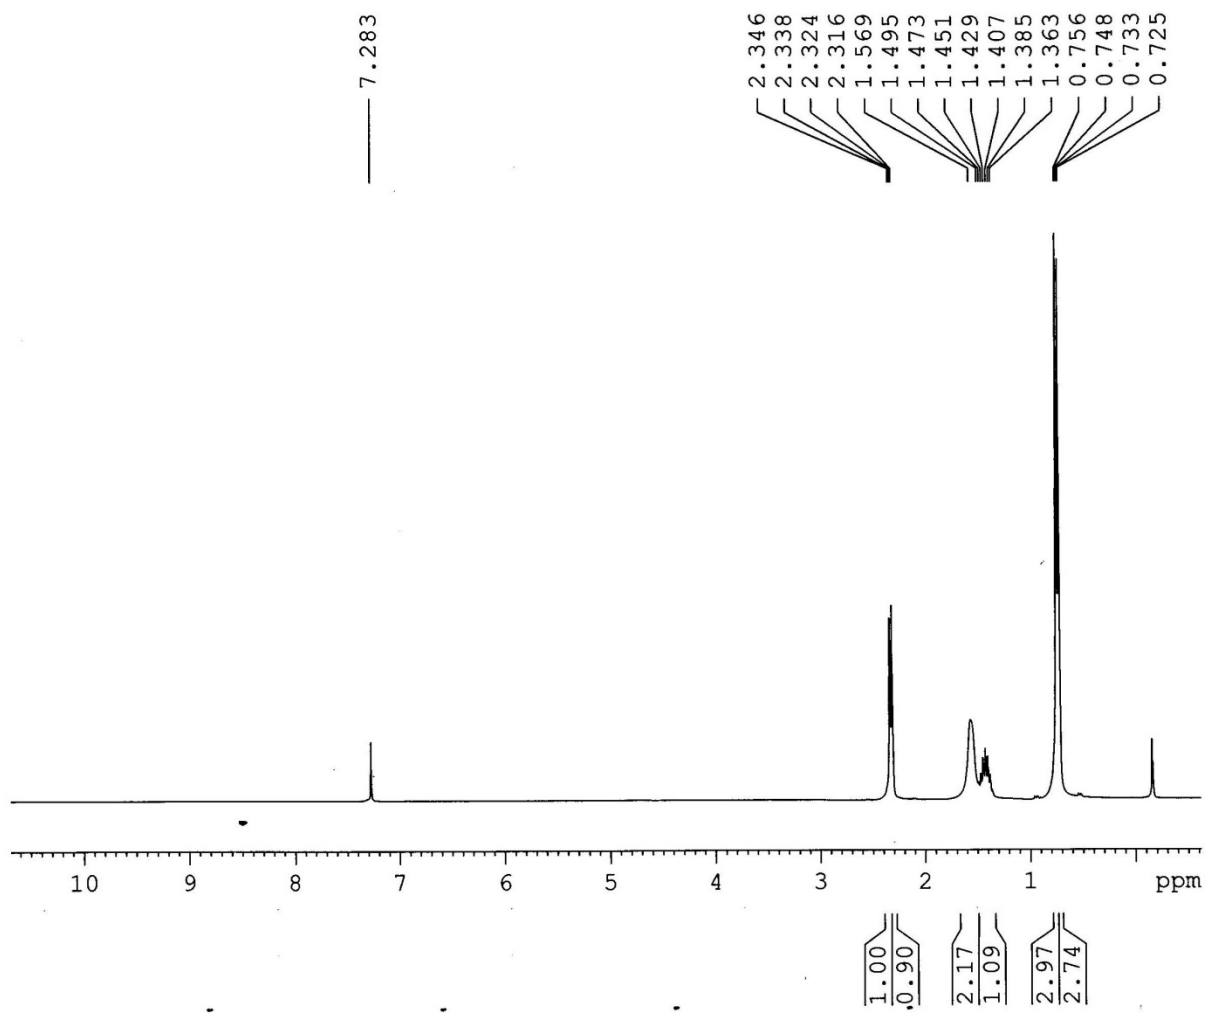

**Fig. S13**  $^1\text{H}$  NMR spectrum of 2-methylpropan-1-amine in  $\text{CDCl}_3$ .

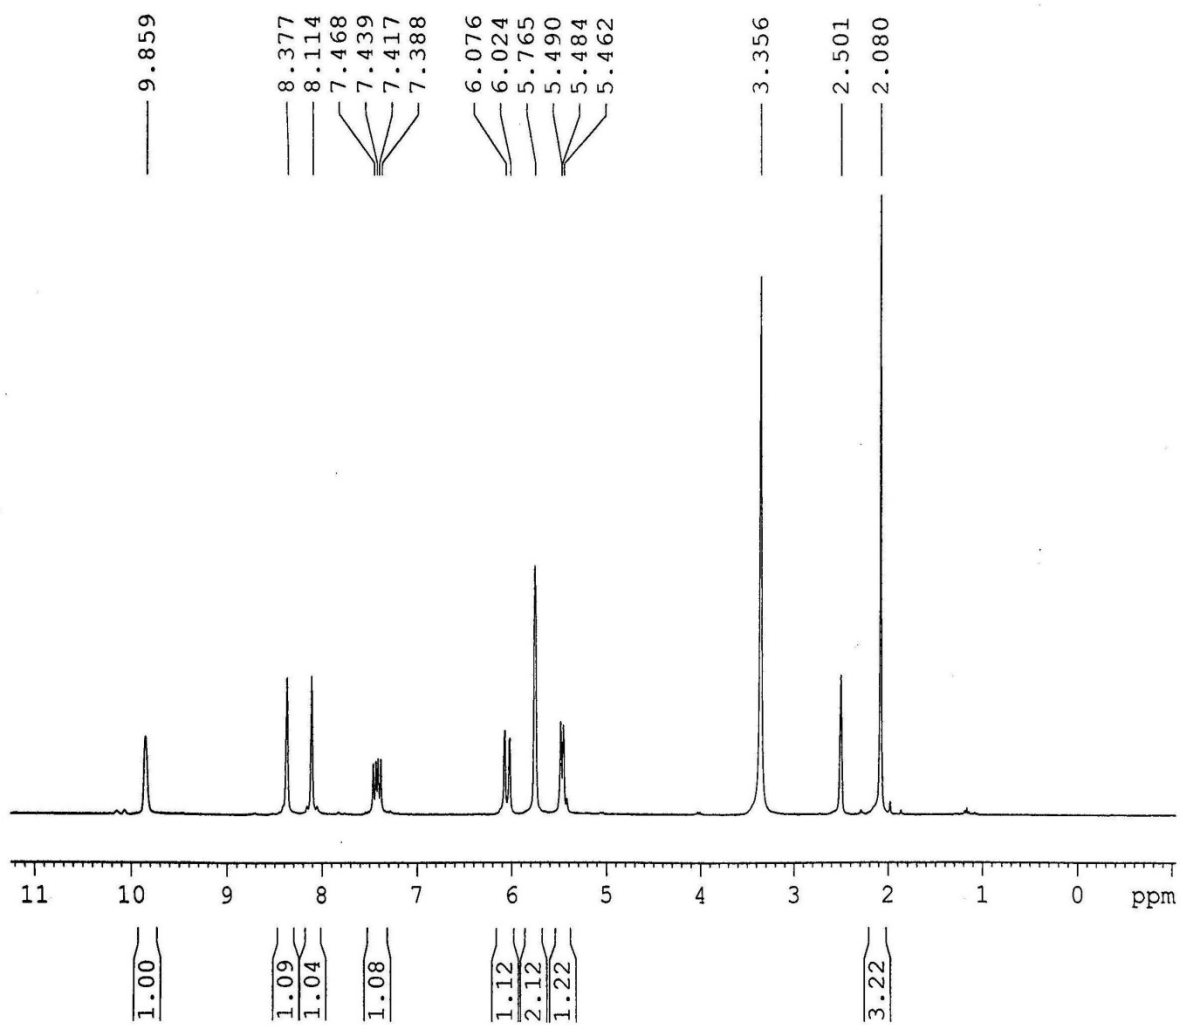

**Fig. S14**  $^1\text{H}$  NMR spectrum of 3-Cyanomethyl-1-vinylimidazolium chloride in  $\text{DMSO-}d_6$ .
